# Supplementary material
Source: PubMed Central journal article supplement (PMC2752023)
Supplement: NIHMS98275-supplement-1.pdf [file NIHMS98275-supplement-1.pdf]

**Comparison of benzil and trifluoromethyl ketone (TFK)-mediated carboxylesterase inhibition using classical and 3-D quantitative structure activity relationship analysis**

Toshiyuki Harada<sup>a, †</sup>, Yoshiaki Nakagawa<sup>a, †</sup>, Randy M. Wadkins<sup>b</sup>, Philip M. Potter<sup>c</sup>, Craig E. Wheelock<sup>d,\*</sup>

<sup>a</sup>Division of Applied Life Sciences, Graduate School of Agriculture, Kyoto University, Kyoto 606-8502, Japan

<sup>b</sup>Department of Chemistry and Biochemistry, University of Mississippi, University, MS 38677, USA

<sup>c</sup>Department of Molecular Pharmacology, St. Jude Children's Research Hospital, Memphis, TN 38105, USA

<sup>d</sup>Division of Physiological Chemistry II, Department of Medical Biochemistry and Biophysics, Scheeles väg 2, Karolinska Institutet, 171 77 Stockholm, Sweden

<sup>†</sup> These authors contributed equally to this manuscript

\* Corresponding author.

Craig Wheelock

Tel.: +46-8-5248-7630

Fax: +46-8-736-0439

Email: craig.wheelock@ki.se

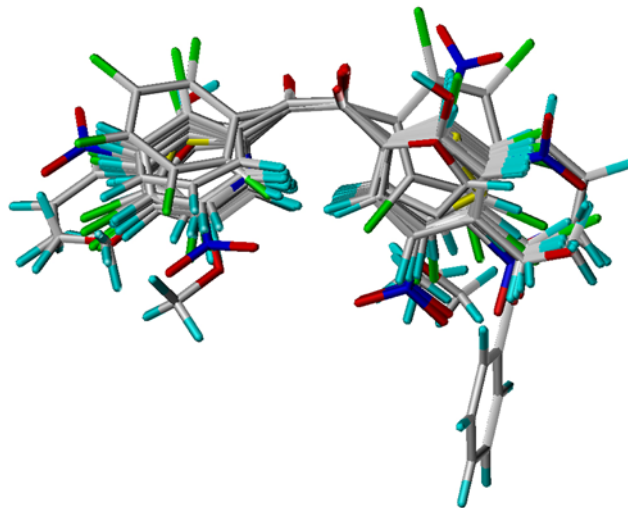

**Figure S1.** Superposition of all 32 benzil-analogs used to generate the CoMFA models.

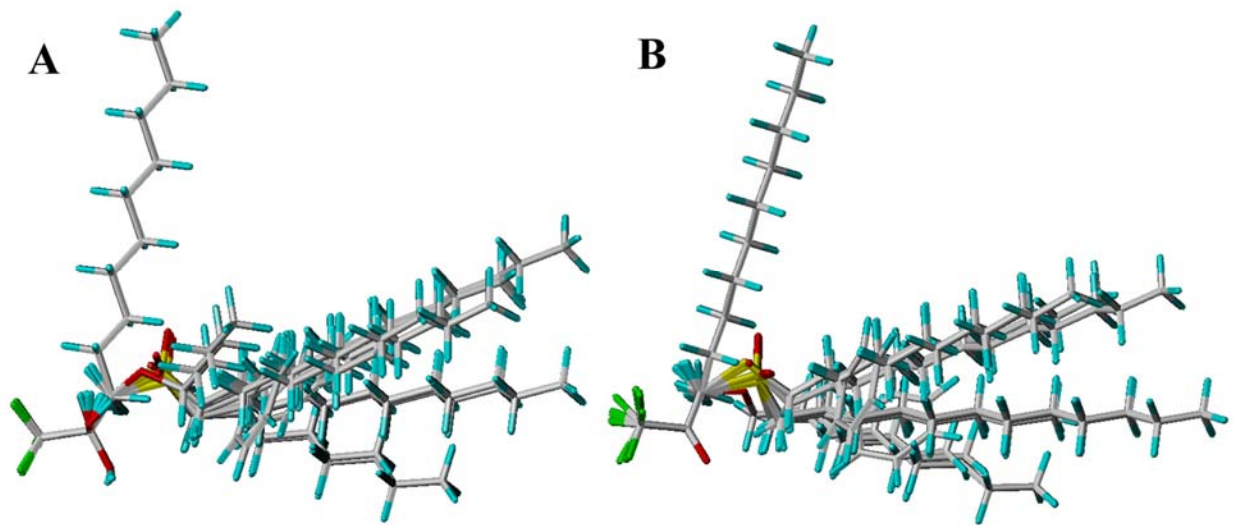

**Figure S2.** Superposition of TFKs in *gem*-diol (A) and ketone (B) geometries with all 17 TFK compounds.

The alkyl moiety of -S- containing compounds (33, 36, 40, 43, 47, 48) go through this ring. These compounds demonstrate relatively high activity.

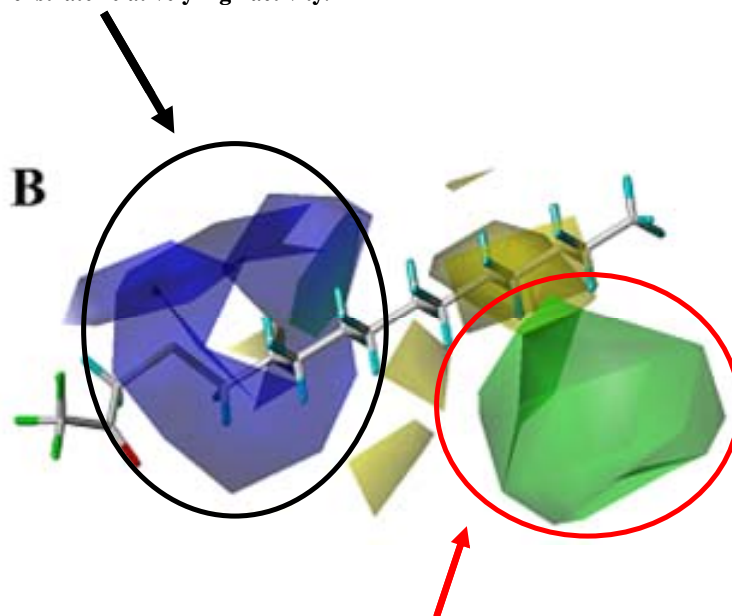

The alkyl moiety of  $-(=O)S(=O)-$  containing long chain TFK compounds (35, 38) reach the green region. These compounds show relatively high activity.

**Figure S3.** CoMFA map for the hiCE model with the TFK inhibitor in the ketone form. Specific areas of enhanced activity are described on the map.

The alkyl moiety of the  $-CH_2-$  containing compound (39) goes through this ring.  
This compound demonstrate relatively high activity.

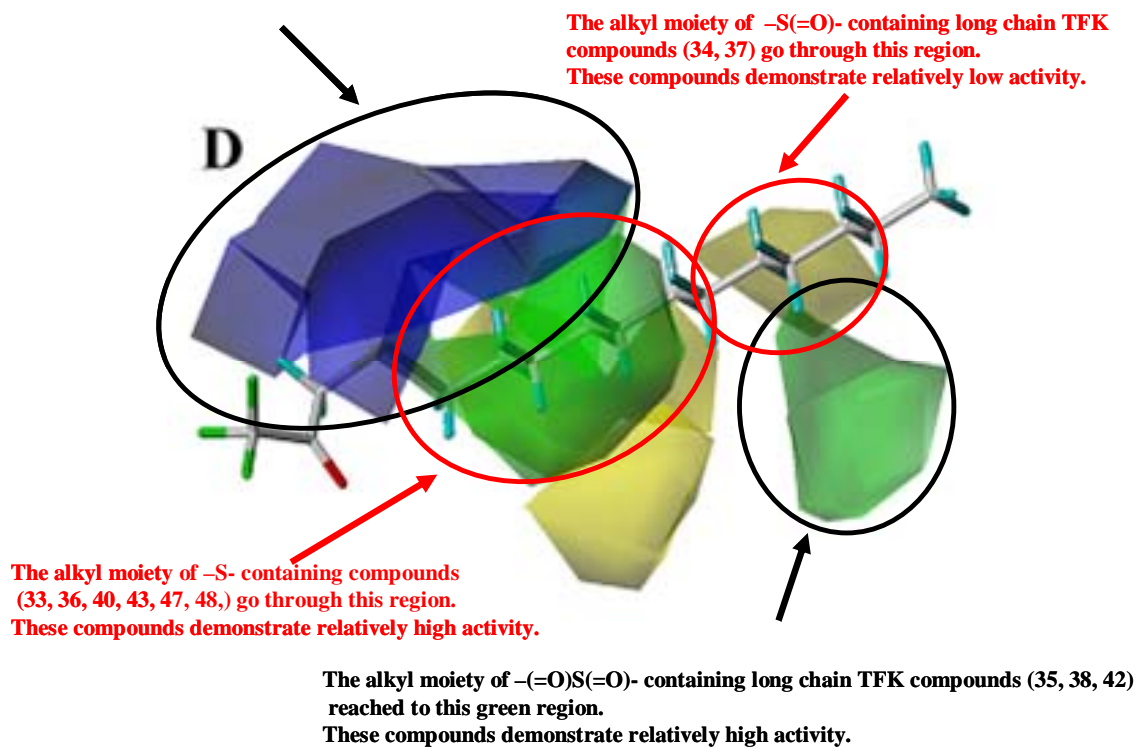

**Figure S4.** CoMFA map for the hCE1 model with the TFK inhibitor in the ketone form. Specific areas of enhanced activity are described on the map.

The alkyl moiety of the  $-CH_2-$  containing compound (39) goes through this region.  
This compound demonstrated relatively high activity.

The alkyl moiety of  $-S(=O)-$  containing long TFK compounds (34,37) go through this region.  
These compounds demonstrated relatively low activity.

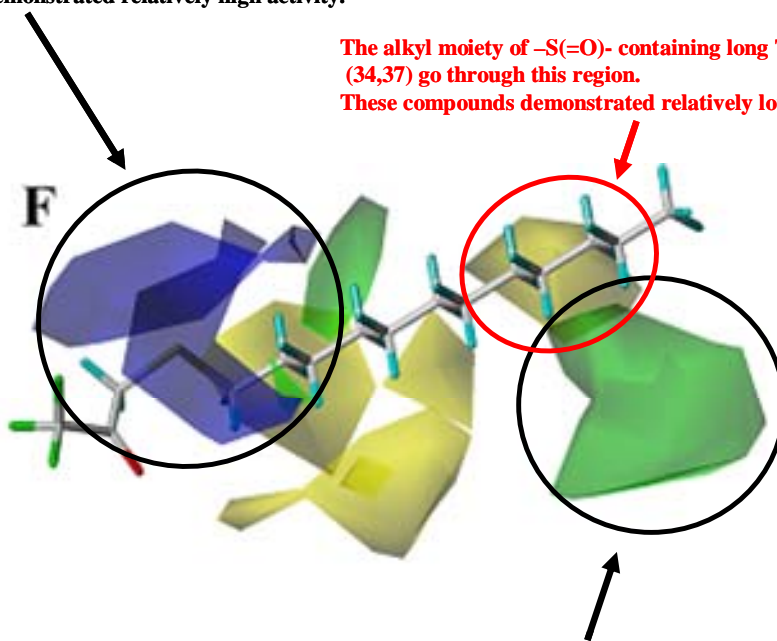

The alkyl moiety of  $-(=O)S(=O)-$  containing long TFK compounds (35, 38) reached to this green region.  
These compounds demonstrated relatively high activity.

**Figure S5.** CoMFA map for the rCE model with the TFK inhibitor in the ketone form. Specific areas of enhanced activity are described on the map.

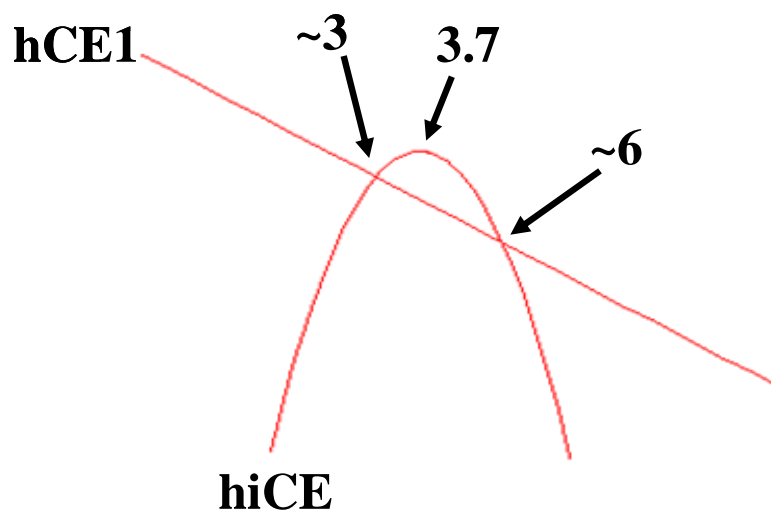

**Figure S6.** Graphs of the classical QSAR equations for the benzil-analogs displaying the volume dependence of hCE1 and hiCE (Eq. 1 and Eq. 2). To make the graphs, a distinct assumption was made that the log P term is constant (however, it ranges from -3.2 to 7.2). Accordingly, each equation was changed to the corresponding quadric equation using this hypothesis and graphed using GCalcPlus (ver. 2.03), with the resulting equations shown below:

$$pK_i = -1.79 \text{ vol}^2 + 13.2 \text{ vol} + 17.0 \quad (\text{Eq. 1}')$$

$$pK_i = -0.883 \text{ vol} + c \quad (\text{Eq. 2}')$$

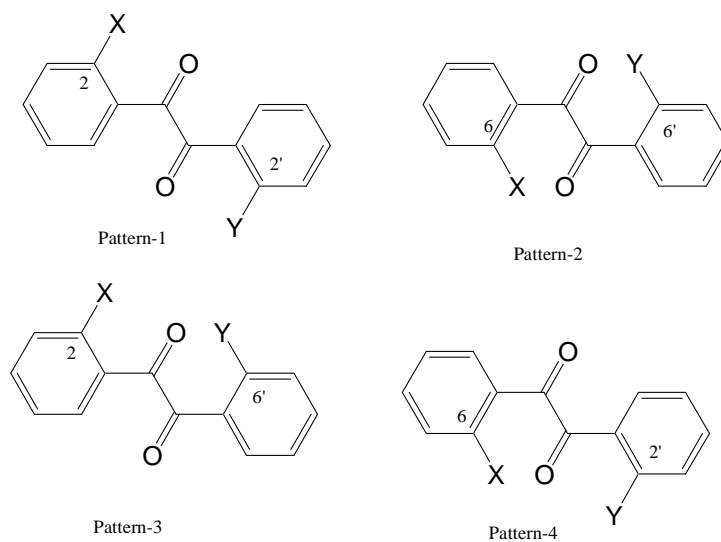

**Figure S7.** The four conformer patterns tested to determine the most stable conformation for construction of the superposition for the CoMFA model. Pattern 1 was selected as the template for model construction, even though the difference between Pattern 1 and 3 was only 4 kcal/mol with respect to the enthalpy of formation ( $\Delta H$ ).



**Table S1.** Experimental and predicted  $pK_i$  values and associated physicochemical parameters for all compounds based upon the mixed benzil-analog and TFK inhibitor CoMFA analysis.

| N° | Observed |      |      | log P | log P <sup>2</sup> | vol  | vol <sup>2</sup> | Predicted |      |      |
|----|----------|------|------|-------|--------------------|------|------------------|-----------|------|------|
|    | hiCE     | hCE1 | rCE  |       |                    |      |                  | hiCE      | hCE1 | rCE  |
| 1  | 7.83     | 7.35 | 6.99 | 3.38  | 11.42              | 3.33 | 11.07            | 7.02      | 6.72 | 6.52 |
| 2  | 6.78     | 6.64 | 6.40 | 3.76  | 14.14              | 3.49 | 12.15            | 6.94      | 6.66 | 7.02 |
| 3  | 6.97     | 6.74 | 8.02 | 4.90  | 24.01              | 3.69 | 13.61            | 7.33      | 6.93 | 8.02 |
| 4  | 6.45     | 5.78 | 6.66 | 4.90  | 24.01              | 3.61 | 13.01            | 6.58      | 6.09 | 6.33 |
| 5  | 7.63     | 7.13 | 7.76 | 4.06  | 16.48              | 3.63 | 13.18            | 6.95      | 6.49 | 7.62 |
| 6  | 6.59     | 6.43 | 7.32 | 4.07  | 16.56              | 3.77 | 14.22            | 6.79      | 6.38 | 7.83 |
| 7  | 7.15     | 6.28 | 7.19 | 3.39  | 11.49              | 3.26 | 10.64            | 7.18      | 6.83 | 7.43 |
| 8  | 7.74     | 7.32 | 7.62 | 4.17  | 17.39              | 3.33 | 11.07            | 7.58      | 7.04 | 7.25 |
| 9  | 7.64     | 6.80 | 7.79 | 4.67  | 21.81              | 3.72 | 13.83            | 7.60      | 6.61 | 7.25 |
| 10 | 7.48     | 6.90 | 6.92 | 3.88  | 15.05              | 3.32 | 11.05            | 7.66      | 6.81 | 6.89 |
| 11 | 7.22     | 6.27 | 7.30 | 4.38  | 19.18              | 3.79 | 14.33            | 7.51      | 6.54 | 7.24 |
| 12 | 8.39     | 7.00 | 6.97 | 4.33  | 18.75              | 3.32 | 11.01            | 8.07      | 6.95 | 7.21 |
| 13 | 7.99     | 6.76 | 6.70 | 3.60  | 12.96              | 3.34 | 11.15            | 7.79      | 6.60 | 6.84 |
| 14 | 7.15     | 5.47 | 6.24 | 3.61  | 13.03              | 4.08 | 16.63            | 7.34      | 5.89 | 7.00 |
| 15 | 6.86     | 5.81 | 7.14 | 3.61  | 13.03              | 4.05 | 16.41            | 7.22      | 5.60 | 6.90 |
| 16 | 8.05     | 5.48 | 7.44 | 4.04  | 16.32              | 3.71 | 13.75            | 8.27      | 6.25 | 7.50 |
| 17 | 7.67     | 7.11 | 7.82 | 4.16  | 17.31              | 3.30 | 10.92            | 7.57      | 7.09 | 7.78 |
| 18 | -        | -    | 8.06 | -1.38 | 1.90               | 4.39 | 19.28            | 7.96      | 4.96 | 8.19 |
| 19 | 8.10     | 6.53 | 7.92 | 0.59  | 0.35               | 3.32 | 11.02            | 8.31      | 6.33 | 7.85 |
| 20 | 7.51     | 6.67 | 7.66 | 0.09  | 0.01               | 3.31 | 10.99            | 7.32      | 6.77 | 7.71 |
| 21 | 6.68     | -    | 6.28 | -3.20 | 10.24              | 3.28 | 10.77            | 6.67      | 5.72 | 6.42 |
| 22 | 6.40     | 4.74 | 6.57 | -3.20 | 10.24              | 4.00 | 15.99            | 6.33      | 4.59 | 6.05 |
| 23 | 7.14     | -    | 7.27 | 4.68  | 21.90              | 4.02 | 16.19            | 7.32      | 6.32 | 7.31 |
| 24 | 6.42     | 5.77 | 6.08 | 7.20  | 51.84              | 3.96 | 15.71            | 5.92      | 5.86 | 6.84 |
| 25 | 8.25     | 8.10 | 8.21 | 4.89  | 23.91              | 3.29 | 10.80            | 8.07      | 8.26 | 8.62 |
| 26 | 5.98     | 6.67 | 6.06 | 2.84  | 8.07               | 2.92 | 8.55             | 6.28      | 7.03 | 6.98 |
| 27 | 5.18     | 6.44 | 5.62 | 2.84  | 8.07               | 2.86 | 8.19             | 5.60      | 6.83 | 5.60 |
| 28 | 7.24     | 7.52 | 8.66 | 4.61  | 21.25              | 3.47 | 12.04            | 6.75      | 7.18 | 7.97 |
| 29 | 6.63     | 6.68 | 8.15 | 4.61  | 21.25              | 3.45 | 11.91            | 6.72      | 7.10 | 7.62 |
| 30 | 5.10     | 5.93 | 5.07 | 1.24  | 1.54               | 2.66 | 7.09             | 5.55      | 6.28 | 5.32 |
| 31 | 6.82     | 6.90 | 6.32 | 0.90  | 0.81               | 3.17 | 10.04            | 6.90      | 6.25 | 5.95 |
| 32 | 7.07     | 6.59 | 8.98 | 5.73  | 32.83              | 4.59 | 21.11            | 7.05      | 6.23 | 8.75 |
| 33 | 7.82     | 7.15 | 6.80 | 6.63  | 43.96              | 2.02 | 4.07             | 7.57      | 7.18 | 6.98 |
| 34 | 7.27     | 5.72 | 5.96 | 5.12  | 26.21              | 2.01 | 4.05             | 6.88      | 5.42 | 5.69 |

|           |      |      |      |      |       |      |      |      |      |      |
|-----------|------|------|------|------|-------|------|------|------|------|------|
| <b>35</b> | 7.49 | 6.13 | 6.82 | 5.04 | 25.40 | 2.02 | 4.07 | 7.67 | 6.07 | 6.62 |
| <b>36</b> | 6.82 | 6.89 | 6.80 | 5.57 | 31.02 | 2.02 | 4.06 | 7.01 | 6.92 | 6.80 |
| <b>37</b> | 5.72 | 5.28 | 5.60 | 4.06 | 16.48 | 2.02 | 4.06 | 6.13 | 5.26 | 5.54 |
| <b>38</b> | 7.10 | 6.10 | 6.66 | 3.98 | 15.84 | 2.01 | 4.05 | 6.97 | 5.82 | 6.26 |
| <b>39</b> | 7.66 | 6.82 | 6.85 | 5.11 | 26.11 | 2.01 | 4.03 | 8.02 | 6.98 | 6.70 |
| <b>40</b> | 6.66 | 6.72 | 6.82 | 4.51 | 20.34 | 2.02 | 4.07 | 6.60 | 6.69 | 6.63 |
| <b>41</b> | 5.62 | 4.83 | 5.31 | 3.00 | 9.00  | 2.01 | 4.03 | 5.21 | 4.84 | 5.15 |
| <b>42</b> | 5.33 | 5.82 | 5.32 | 2.92 | 8.53  | 2.01 | 4.05 | 5.65 | 5.52 | 5.70 |
| <b>43</b> | 6.25 | 6.48 | 6.60 | 3.46 | 11.97 | 2.02 | 4.06 | 6.14 | 6.42 | 6.39 |
| <b>44</b> | 4.17 | 4.10 | 4.64 | 1.95 | 3.80  | 2.01 | 4.03 | 4.50 | 4.61 | 4.86 |
| <b>45</b> | 4.56 | 5.01 | 4.82 | 1.87 | 3.50  | 2.01 | 4.03 | 4.75 | 5.26 | 5.32 |
| <b>46</b> | 5.04 | 5.48 | 5.57 | 2.76 | 7.62  | 2.02 | 4.07 | 4.71 | 5.46 | 5.39 |
| <b>47</b> | 5.77 | 6.10 | 6.38 | 2.40 | 5.76  | 2.02 | 4.07 | 5.79 | 6.12 | 6.10 |
| <b>48</b> | 6.12 | 6.92 | 6.39 | 2.91 | 8.47  | 2.02 | 4.07 | 5.91 | 6.39 | 6.32 |
| <b>49</b> | 4.29 | 4.86 | 4.87 | 1.32 | 1.74  | 2.01 | 4.04 | 4.14 | 5.09 | 5.17 |

---
